# Supplementary material
Source: PubMed Central journal article supplement (PMC9827082)
Supplement: ajcr0012-5425-f12.pdf [file ajcr0012-5425-f12.pdf]

## ALDH2 in gastric cancer

**Supplementary Table 1.** The univariable analysis of the clinical features relevant to survival

| Characteristics  | Total(N) | Univariate analysis   |           |
|------------------|----------|-----------------------|-----------|
|                  |          | Hazard ratio (95% CI) | P value   |
| Age              | 367      |                       |           |
| ≤65              | 163      | /                     |           |
| >65              | 204      | 1.620 (1.154-2.276)   | 0.005**   |
| Pathologic stage | 347      |                       |           |
| Stage 1          | 50       | /                     |           |
| Stage 2          | 110      | 1.551 (0.782-3.078)   | 0.209     |
| Stage 3          | 149      | 2.381 (1.256-4.515)   | 0.008**   |
| Stage 4          | 38       | 3.991 (1.944-8.192)   | <0.001*** |
| Gender           | 370      |                       |           |
| Female           | 133      | /                     |           |
| Male             | 237      | 1.267 (0.891-1.804)   | 0.188     |
| T stage          | 362      |                       |           |
| T1               | 18       | /                     |           |
| T2               | 78       | 6.725 (0.913-49.524)  | 0.061     |
| T3               | 167      | 9.548 (1.326-68.748)  | 0.025*    |
| T4               | 99       | 9.634 (1.323-70.151)  | 0.025*    |
| N stage          | 352      |                       |           |
| N0               | 107      | /                     |           |
| N1               | 97       | 1.629 (1.001-2.649)   | 0.049*    |
| N2               | 74       | 1.655 (0.979-2.797)   | 0.060     |
| N3               | 74       | 2.709 (1.669-4.396)   | <0.001*** |
| M stage          | 352      |                       |           |
| M0               | 327      | /                     |           |
| M1               | 25       | 2.254 (1.295-3.924)   | 0.004**   |

Note: \*P<0.05, \*\*P<0.01, \*\*\*P<0.001.

# ALDH2 in gastric cancer

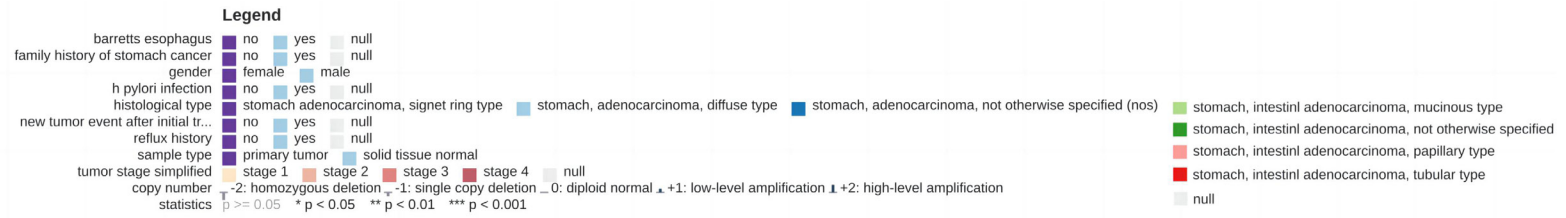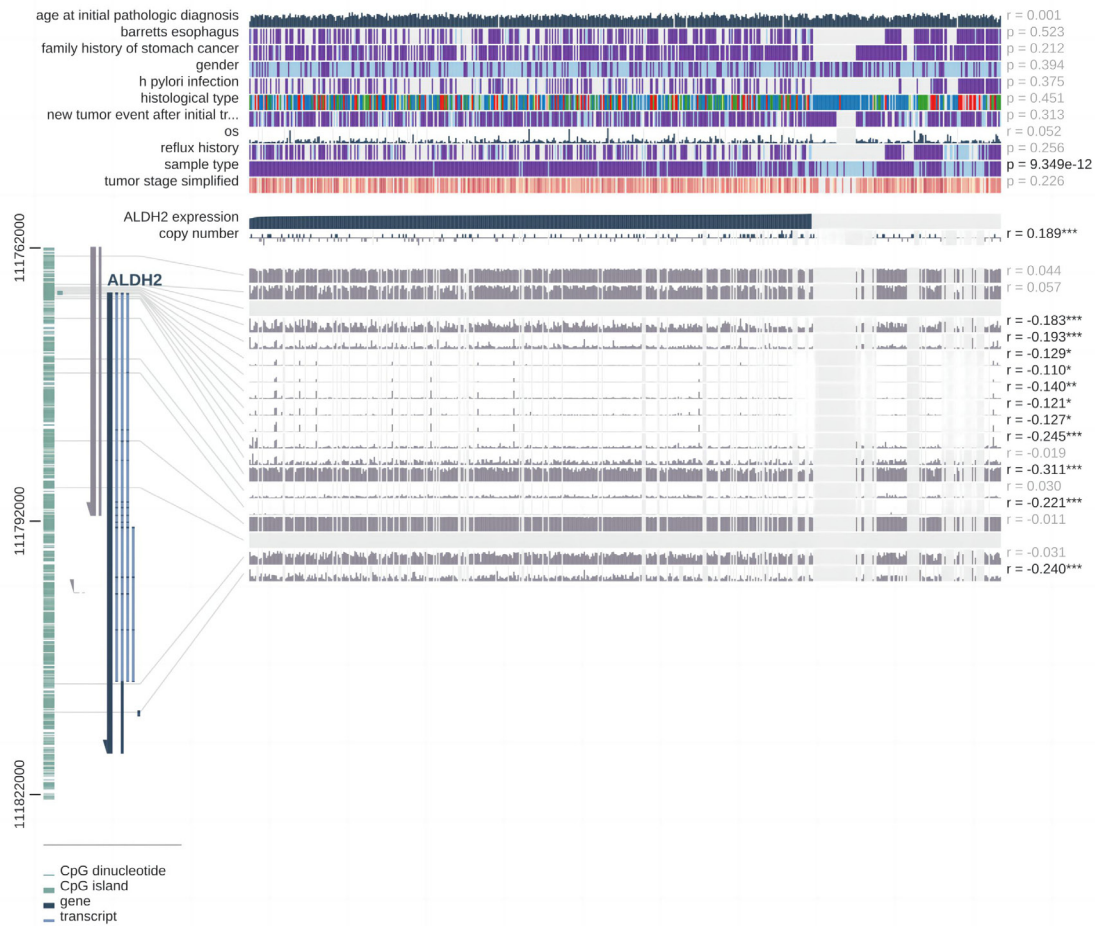

Supplementary Figure 1. The DNA methylation and expression of ALDH2 in gastric cancer.

## ALDH2 in gastric cancer

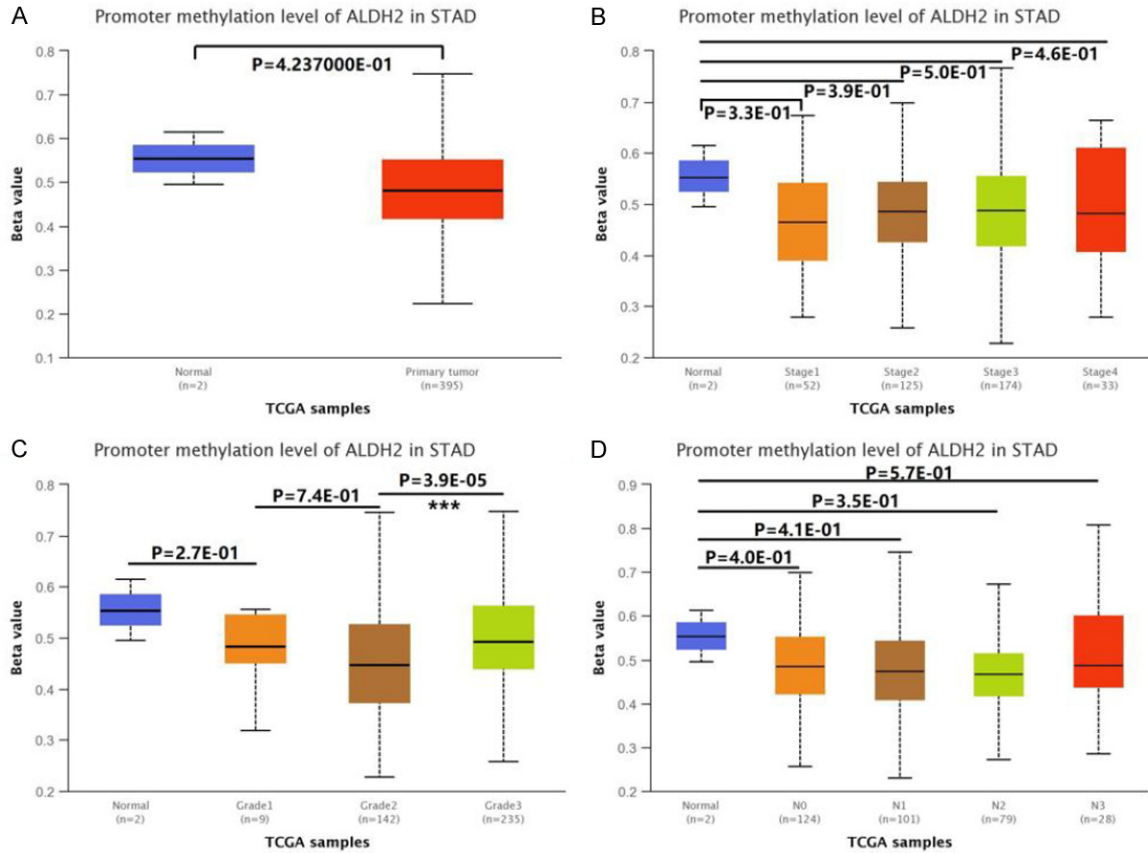

**Supplementary Figure 2.** The methylation of ALDH2 in gastric cancer. A. The methylation level of ALDH2 in gastric cancer sorted by tissue type. B. The methylation level of ALDH2 in gastric cancer sorted by tumor stage. C. The methylation level of ALDH2 in gastric cancer sorted by tumor grade. D. The methylation level of ALDH2 in gastric cancer sorted by nodal metastasis status.

### Cox Proportional Hazard Model:

```

Model: Surv(STAD) ~ Age + Gender + Race + Purity + Stage + E_cell + CD4_Tcell + CD8_Tcell + Neutrophil + Macrophage + Dendritic + ALDH2
278 patients with 104 dying

```

|            | coef   | HR       | 95%CI_l | 95%CI_u    | p.value | sig |
|------------|--------|----------|---------|------------|---------|-----|
| Age        | 0.038  | 1.038    | 1.017   | 1.060      | 0.000   | *** |
| gendermale | 0.236  | 1.266    | 0.816   | 1.964      | 0.293   |     |
| raceblack  | 0.545  | 1.724    | 0.686   | 4.334      | 0.247   |     |
| racewhite  | 0.271  | 1.311    | 0.763   | 2.253      | 0.326   |     |
| Purity     | -0.507 | 0.602    | 0.268   | 1.355      | 0.221   |     |
| stage2     | 0.748  | 2.114    | 0.927   | 4.822      | 0.075   | .   |
| stage3     | 1.086  | 2.963    | 1.376   | 6.378      | 0.005   | **  |
| stage4     | 1.476  | 4.376    | 1.521   | 12.592     | 0.006   | **  |
| E_cell     | 4.958  | 142.297  | 1.045   | 19383.496  | 0.048   | *   |
| CD4_Tcell  | -4.547 | 0.011    | 0.000   | 2.725      | 0.108   |     |
| CD8_Tcell  | -0.799 | 0.450    | 0.020   | 10.069     | 0.614   |     |
| Neutrophil | -2.763 | 0.063    | 0.000   | 124.898    | 0.476   |     |
| Macrophage | 7.762  | 2348.528 | 53.767  | 102583.567 | 0.000   | *** |
| Dendritic  | 0.831  | 2.297    | 0.118   | 44.690     | 0.583   |     |

Rsquare= 0.137 (max possible= 9.76e-01 )  
 Likelihood ratio test p= 3.26e-04  
 Wald test p= 2.55e-04  
 Score (logrank) test p= 1.24e-04

**Supplementary Figure 3.** Full result of multivariable cox analysis.

# ALDH2 in gastric cancer

## TCGA-STAD Tumor

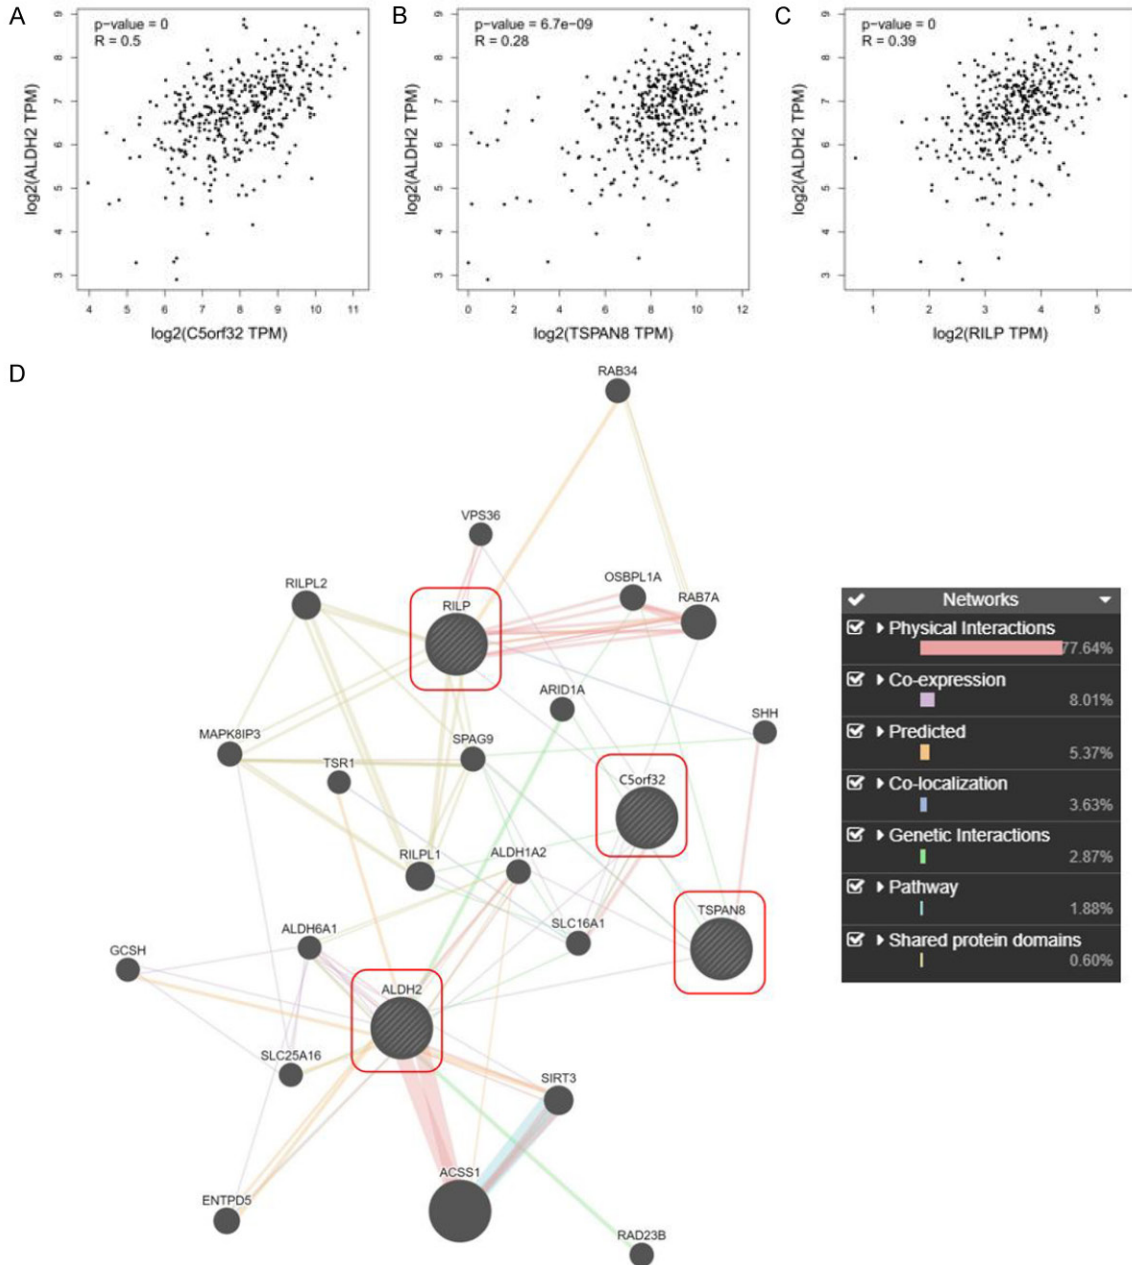

Supplementary Figure 4. The relationship between ALDH2 and C5orf32, TSPAN8, RILP.
